# Supplementary material for: Adipose tissue peroxisomal lipid synthesis orchestrates obesity and insulin resistance through LXR-dependent lipogenesis
Source: PubMed Central journal article supplement — Mol Metab. 2024 Mar 7;82:101913. doi: 10.1016/j.molmet.2024.101913 (PMC10950804; doi:10.1016/j.molmet.2024.101913), 2024-03-07
Supplement: mmc1.pdf [file mmc1.pdf]

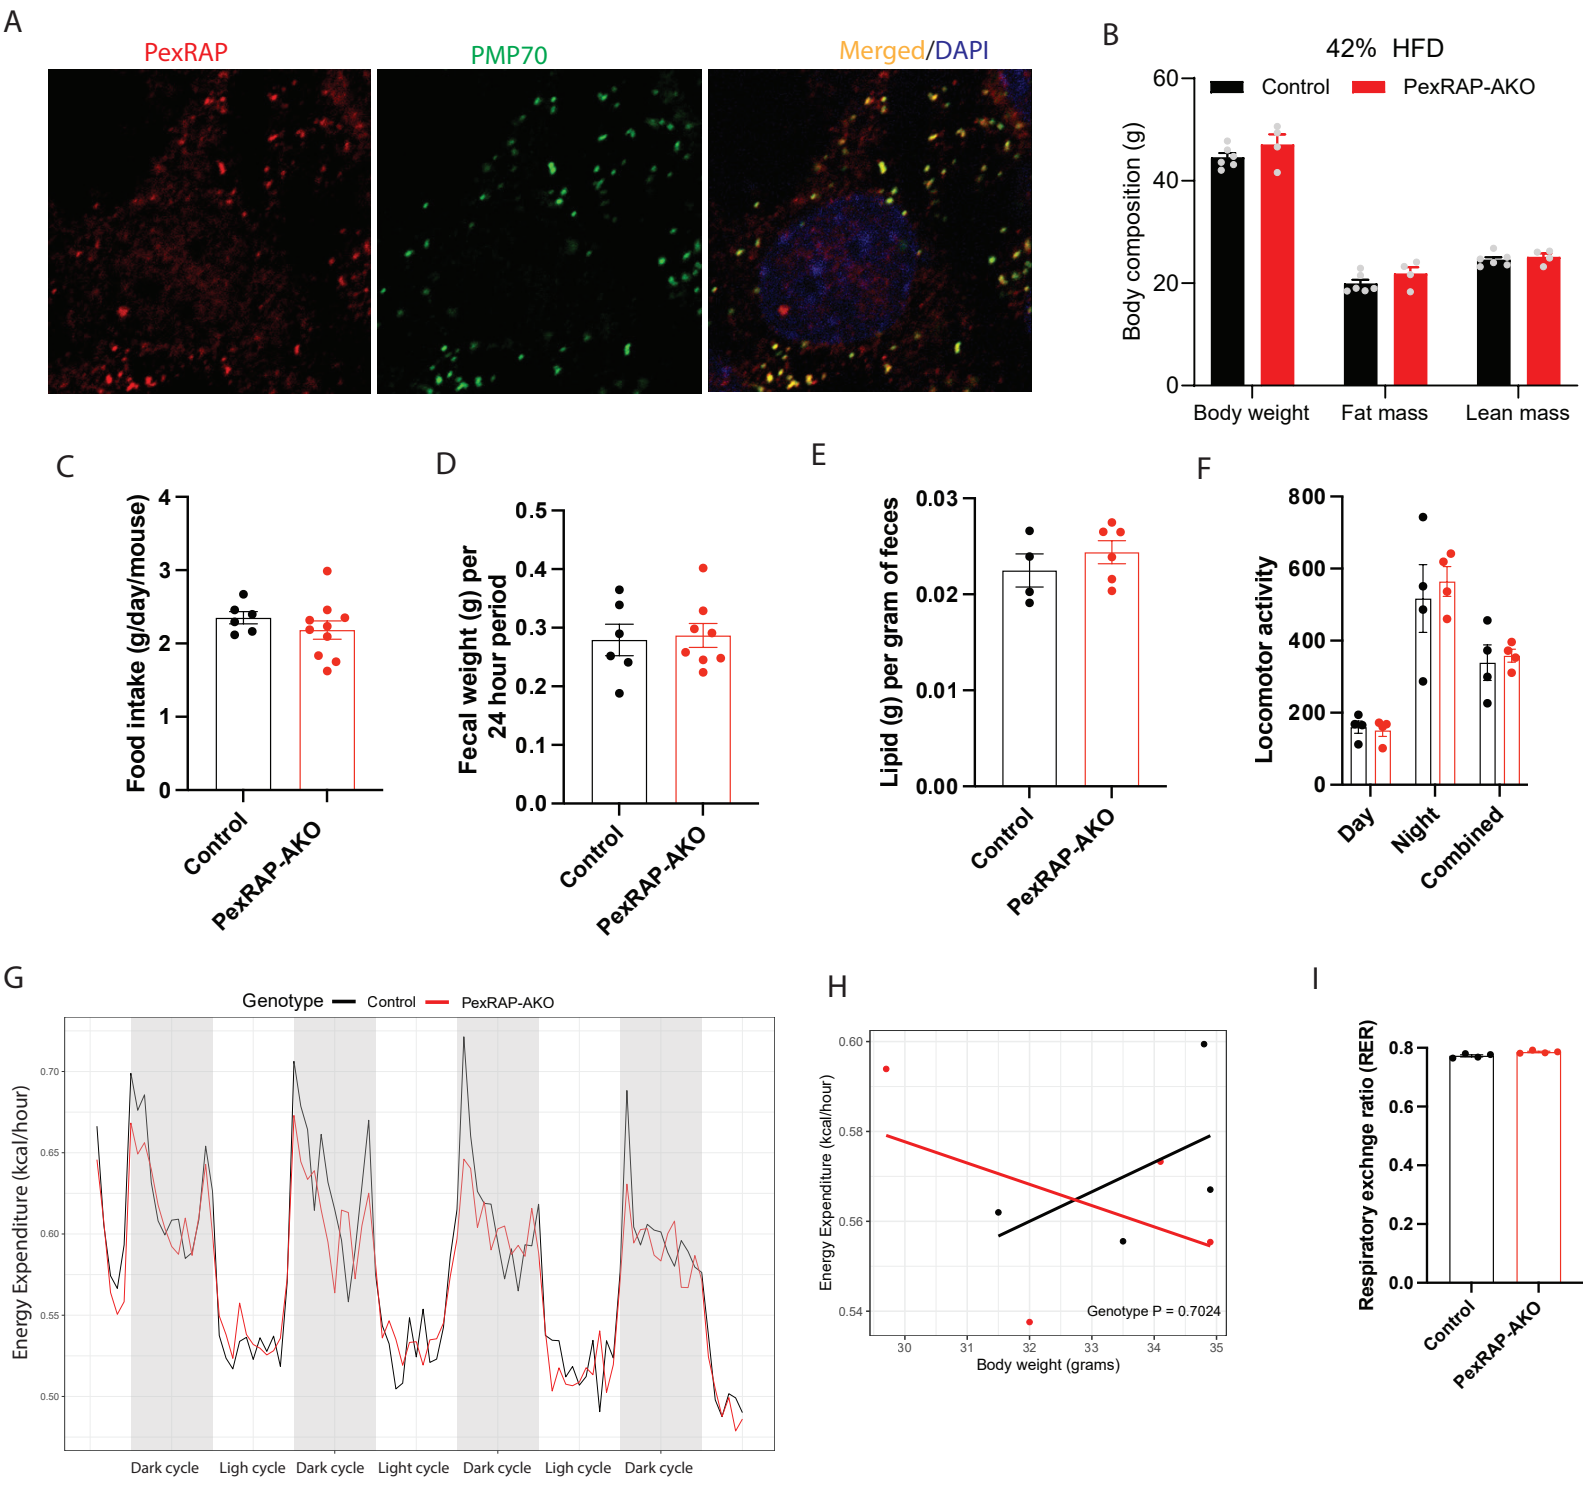

**Supplementary Figure 1. Analysis of energy balance in PexRAP-AKO mice.** **A)** Fluorescence microscopy of PexRAP (red), PMP70 (green) and DAPI (blue) in differentiated iWAT stromal vascular fraction cells. **B)** Body composition results from EchoMRI analysis of male control and PexRAP-AKO mice fed a HFD (42% kcal fat) for 16 weeks (n = 4-6). **C)** HFD (60% kcal fat) food intake (n = 6-10) **D)** daily fecal weight (n = 6-8) and **E)** normalized fecal fat content of control or PexRAP-AKO mice fed a HFD (60% kcal fat) for between 6-16 weeks (n = 4-6). Indirect calorimetry measurements of **F)** locomotor activity, **G- H)** energy expenditure, and **I)** respiratory exchange ratio (RER) from male control and PexRAP-AKO mice fed HFD (60% kcal fat) for 12 weeks (n = 4); lines of best fit represent results of an ANCOVA analysis. Data are shown as mean ± SE M. Comparisons between groups were made with a two-tailed unpaired Student's t-test (C,D,E,F, I) or an ANCOVA analysis to determine the effect of genotype on EE independent of body weight (H).

A

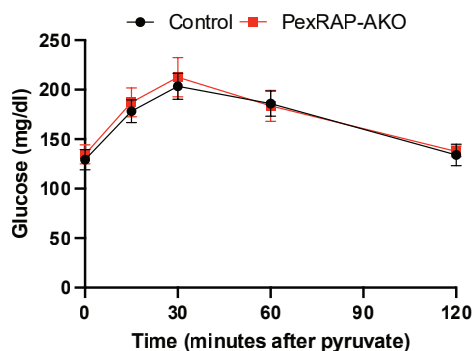

B

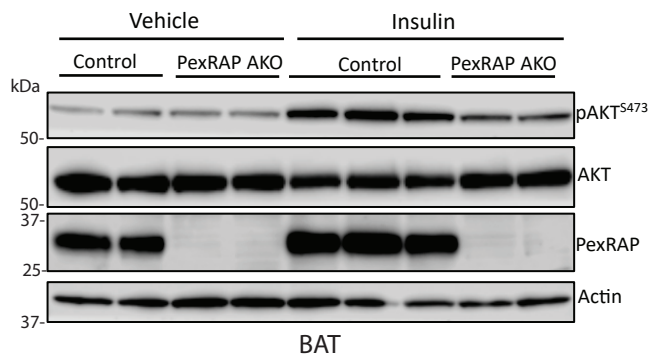

C

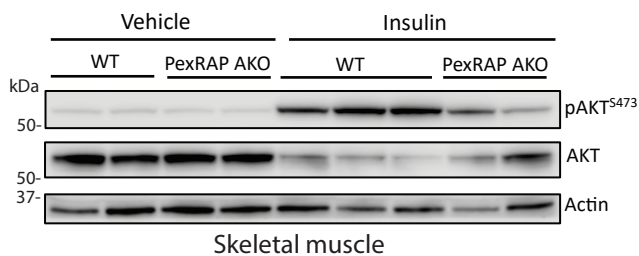

D

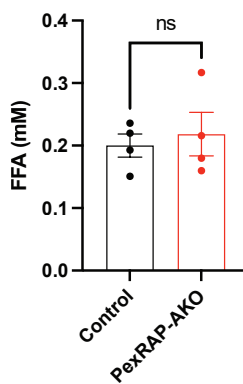

E

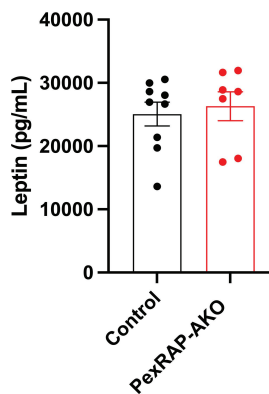

F

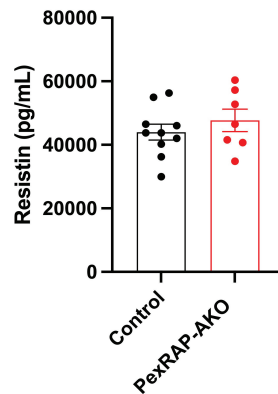

**Supplementary Figure 2. Metabolic phenotyping in PexRAP-AKO mice.** **A**) Pyruvate tolerance test of control or PexRAP-AKO mice fed a HFD (60% kcal fat) for 14 weeks ( $n = 7-9$ ). **B-C**) Western blot analysis in BAT (**B**) and skeletal muscle (**C**) of male HFD-fed control or PexRAP-AKO mice injected intraperitoneally with vehicle or insulin. Tissues were harvested 10 minutes after insulin injection. AKT phosphorylation was analyzed at Ser473. **D**) Serum free fatty acid (FFA) levels of ad-libitum fed male control or PexRAP-AKO mice following 12 weeks of HFD feeding ( $n = 4$ ). **E-F**) Serum levels of leptin and resistin from HFD fed male control and PexRAP-AKO mice ( $n = 7-9$ ). Data are shown as mean  $\pm$  SEM. Comparisons between groups were made with a two-tailed unpaired Student's *t*-test (A,D-F).

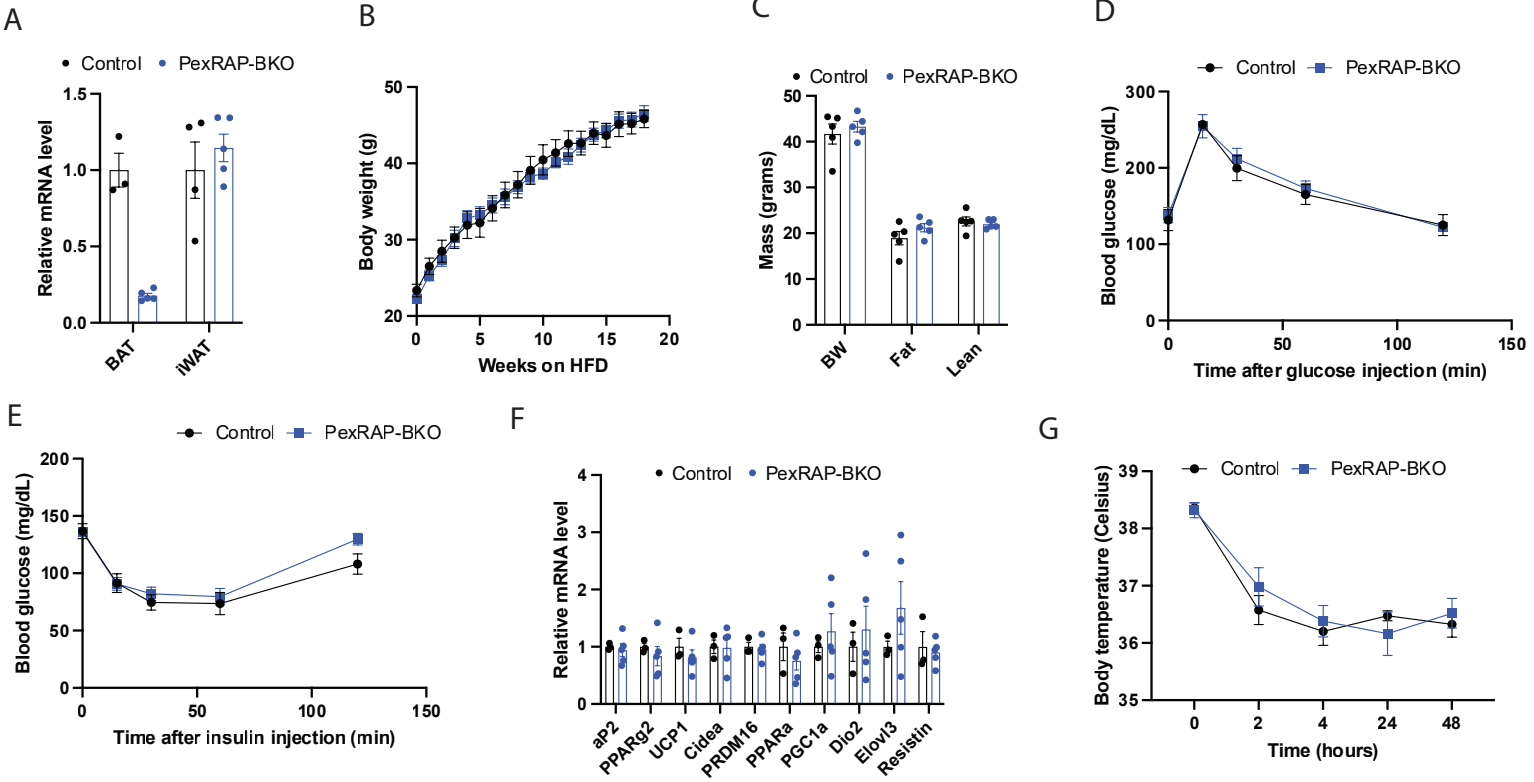

**Supplementary Figure 3. BAT-specific knockout of PexRAP is not sufficient to affect adiposity or metabolism in HFD-fed mice. A)** qPCR analysis of PexRAP mRNA levels in BAT and iWAT of UCP1-cre driven brown adipose tissue specific knockout mice (PexRAP-BKO) (n = 3-5). **B)** Body weights of control or male PexRAP-BKO mice fed a HFD (60% kcal fat) beginning at 6 weeks of age (n = 4-5). **C)** Echo-MRI analysis of body composition of control or PexRAP-BKO mice fed a HFD for 16 weeks (n = 5). **D)** Glucose tolerance test measurements in HFD-fed control and PexRAP-BKO mice (n = 5). **E)** Insulin tolerance test measurements of HFD-fed control or PexRAP-BKO mice (n = 9-12). **F)** qPCR analysis of thermogenic gene mRNA levels in BAT of chow-fed PexRAP-BKO mice (n = 3-5). **G)** Core body temperatures of male control and PexRAP-BKO mice upon exposure to 4°C ambient temperature (n = 4-5). Data are shown as mean  $\pm$  SEM. Comparisons between groups were made with a two-tailed unpaired Student's t-test.

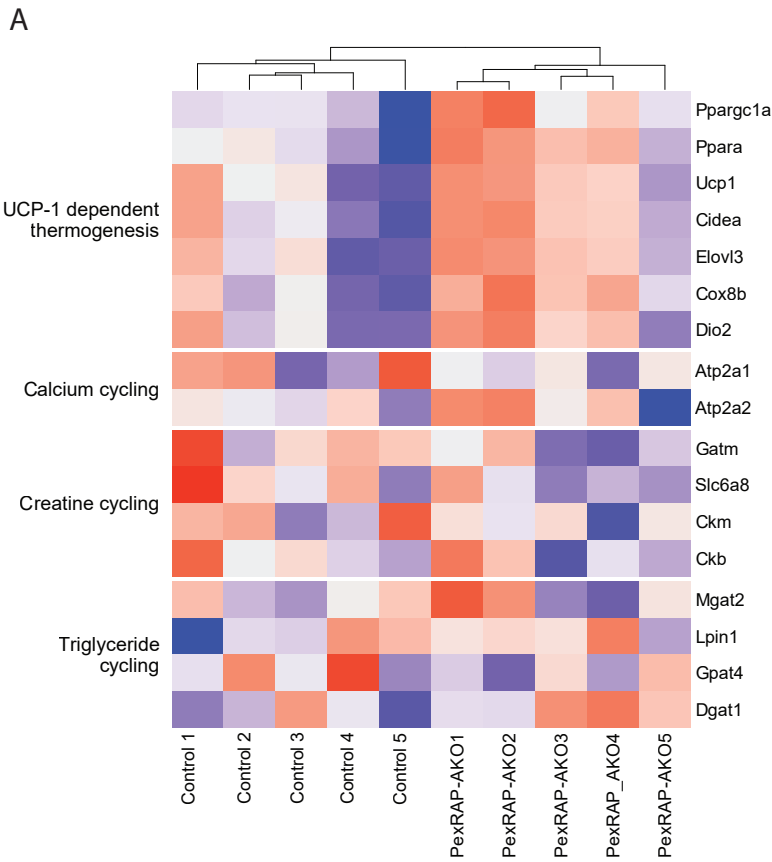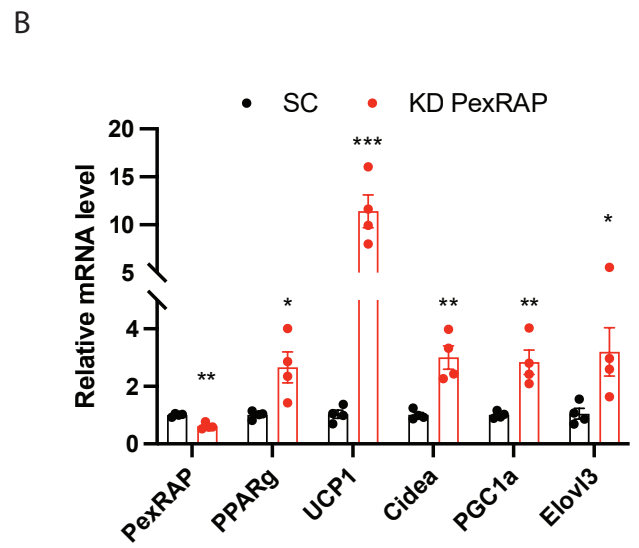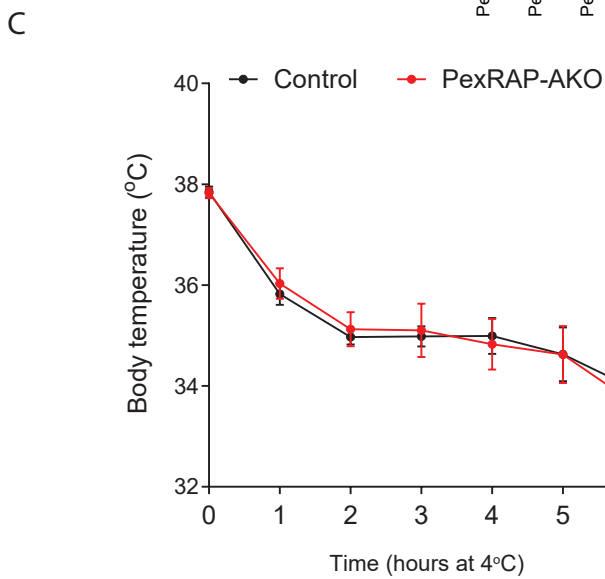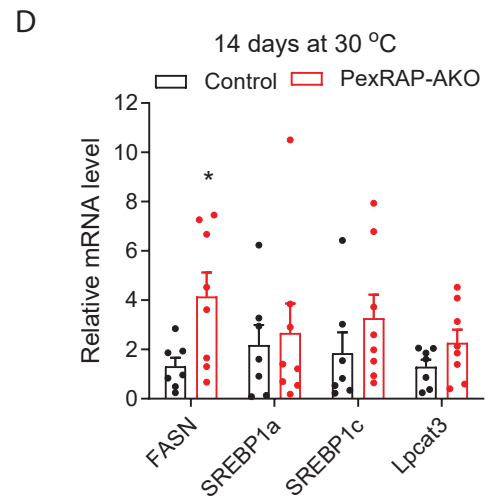

**Supplementary Figure 4. Genes involved in UCP1-dependent thermogenesis are elevated in iWAT of PexRAP-AKO mice. A)** Normalized expression of genes involved in UCP1-dependent and -independent thermogenesis in PexRAP-AKO RNA-seq dataset (n = 5). **B)** qPCR analysis of thermogenic gene expression in differentiated iWAT stromal vascular fraction cells after shRNA-mediated knockdown of PexRAP (n = 4). **C)** Body temperature of control (N=8) and PexRAP-AKO (N=7) mice after cold exposure. **D)** qPCR analysis of lipogenic gene expression in iWAT of control (N=7) and PexRAP-AKO (N=8) mice that were housed at thermoneutrality (30°C) for 14 days. Data are shown as mean  $\pm$  SEM. Comparisons between groups were made with a two-tailed unpaired Student's t-test (B).

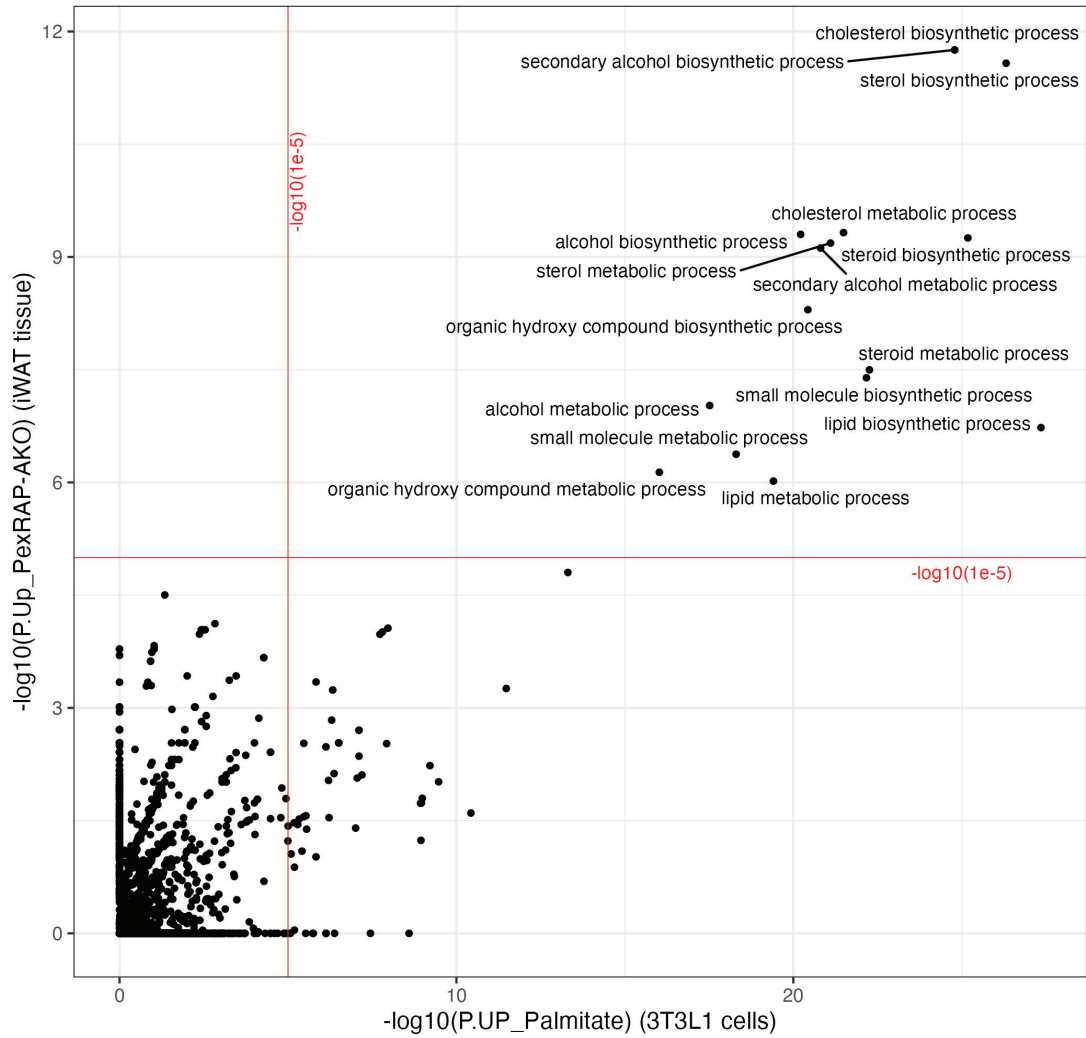

**Supplementary Figure 5. Relationship between GO terms upregulated in iWAT of PexRAP-AKO mice and those upregulated in palmitate-treated 3T3-L1 adipocytes.** Comparison plot of upregulated GO pathways in RNA-seq data from iWAT of male control and PexRAP-AKO mice (y-axis) versus in palmitate-treated 3T3-L1 adipocytes (x-axis) (GSE129442) (n = 3/condition for 3T3-L1 cells, 5/condition for control vs. PexRAP mice). Data are shown as mean  $\pm$  SEM. Comparisons between groups were made with the hypergeometric test built into the R/Bioconductor `limma::goana()` pathway enrichment function.

A

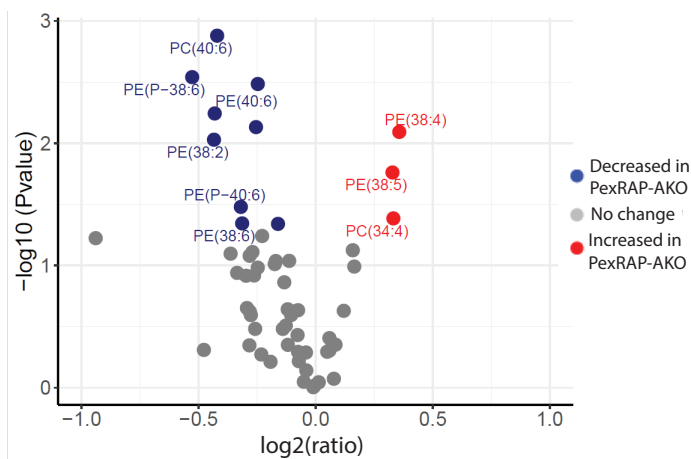

B

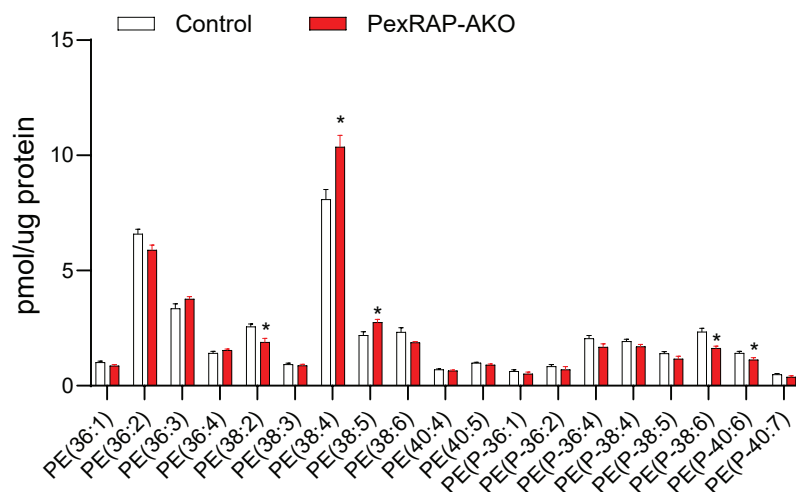

C

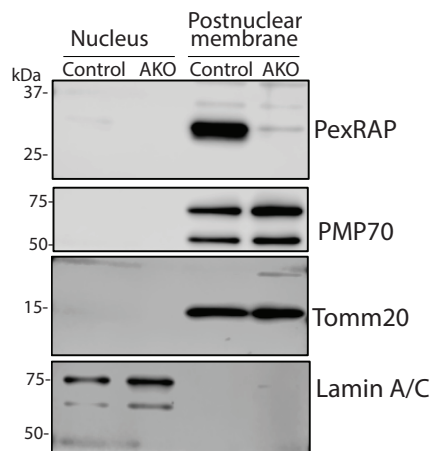

D

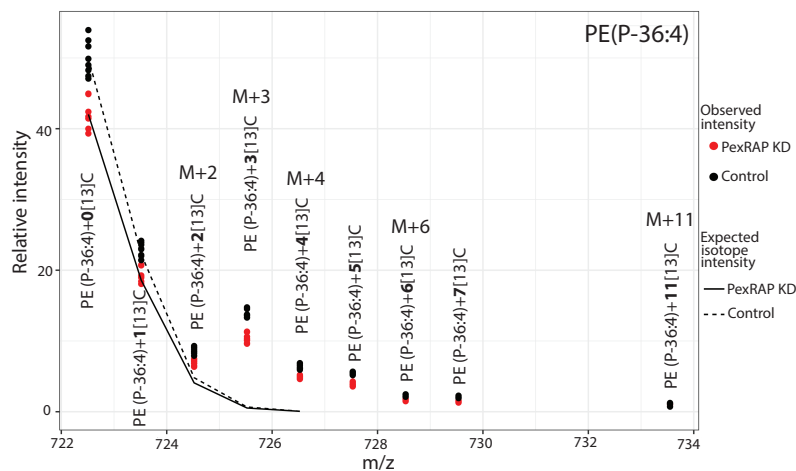

**Supplementary Figure 6. Effect of PexRAP depletion on membrane phospholipids.** Targeted ESI-MS analysis of PC and PE species from the postnuclear fraction of iWAT from HFD fed male control and PexRAP-AKO mice, expressed as **A**) logFC values (PexRAP-AKO versus Control) and **B**) absolute concentrations. **C**) Western blot analysis of nuclear and postnuclear membrane fractions of iWAT from HFD fed male control and PexRAP-AKO mice. **D**) All detected isotopes of PE(P-36:4) in control cells versus PexRAP-KD cells from a ESI-MS-based  $[^{13}\text{C}]$ Carbon-flux analysis of 3T3-L1 cells differentiated to white adipocytes, treated with scrambled (SC) or PexRAP shRNA, and then maintained in  $U[^{13}\text{C}]$ -glucose containing media for 5 days.
